# Supplementary material for: Climatology, sources, and transport characteristics of observed water vapor extrema in the lower stratosphere
Source: Copernicus journal article supplement (doi:10.5194/egusphere-2023-985), 2023-05-22
Supplement: Supplementary file [file egusphere-2023-985-AC2-supplement.pdf]

# Climatology, sources, and transport characteristics of observed water vapor extrema in the lower stratosphere

Emily N. Tinney<sup>1</sup> and Cameron R. Homeyer<sup>1</sup>

<sup>1</sup>School of Meteorology, University of Oklahoma, Norman, OK, USA

**Correspondence:** Emily Tinney (emily.tinney@ou.edu)

## Abstract.

Stratospheric water vapor ( $\text{H}_2\text{O}$ ) is a substantial component of the global radiation budget, and therefore important to variability of the climate system. Efforts to understand the distribution, transport, and sources of stratospheric water vapor have increased in recent years, with many studies utilizing long-term satellite observations. Previous work to examine stratospheric  $\text{H}_2\text{O}$  extrema has typically focused on the stratospheric overworld (pressures  $\leq 100$  hPa) to ensure the observations used are truly stratospheric. However, this leads to the broad exclusion of the lowermost stratosphere, which can extend over depths more than 5 km below the 100 hPa level in the midlatitudes and polar regions and has been shown to be the largest contributing layer to the stratospheric  $\text{H}_2\text{O}$  feedback. Moreover, focusing on the overworld only can lead to a large underestimation of stratospheric  $\text{H}_2\text{O}$  extrema occurrence. Therefore, we expand on previous work by examining 16 years of Microwave Limb Sounder (MLS) observations of water vapor extrema ( $\geq 8$  ppmv) in both the stratospheric overworld and the lowermost stratosphere to create a new lower stratosphere climatology. The resulting frequency of  $\text{H}_2\text{O}$  extrema increases by more than 300% globally compared to extrema frequencies within stratospheric overworld observations only, though the percentage increase varies substantially by region and season. Additional context is provided to this climatology through a backward isentropic trajectory analysis to identify potential sources of the extrema. We show that, in general, tropopause-overshooting convection presents as a likely source of  $\text{H}_2\text{O}$  extrema in much of the world, while meridional isentropic transport of air from the tropical upper troposphere to the extratropical lower stratosphere is also possible.

## 1 Introduction

The troposphere and stratosphere are fundamentally different in their composition of atmospheric trace gases. For example, while abundant in the troposphere, water vapor ( $\text{H}_2\text{O}$ ) in the stratosphere is uniformly low. In the lower stratosphere (LS), however, the per molecule radiative forcing of  $\text{H}_2\text{O}$  is maximized, where even small increases (on the order of  $< 1$  ppmv) can lead to substantial surface warming (Solomon et al., 2010; Dessler et al., 2013; Wang et al., 2017). An understanding of the sources and controls of stratospheric water vapor is therefore essential **for improving our** understanding of the climate system. **This is especially valuable due to the implications of stratospheric  $\text{H}_2\text{O}$  acting as a positive climate feedback, where stratospheric  $\text{H}_2\text{O}$  concentrations increase in response to anthropogenic global warming (Dessler et al., 2013; Banerjee et al., 2019; Konopka et al., 2022; Nowack et al., 2023).** Therefore, it is vital to understand processes that facilitate the

**cross-tropopause transport of air. This transport, known as stratosphere-troposphere exchange (STE)**, can significantly and rapidly alter the composition and therefore radiative forcing of the upper troposphere and lower stratosphere (UTLS).

The LS can be categorized into two separate regions: the extratropical lowermost stratosphere (LMS) and the stratospheric overworld. The stratospheric overworld is conventionally defined where **potential temperature,  $\theta$ , is at least 380 K**, such that isentropes of the stratospheric overworld remain above the tropopause globally (e.g., Hoskins, 1991; Holton et al., 1995; Stohl et al., 2003). The remaining portion of the stratosphere is the LMS, which lies above the extratropical tropopause but below the 380 K isentrope (i.e. below the height of the tropical tropopause). Therefore, the total LS can be thought of as the combination of the LMS and the lower part (i.e.,  $\theta \leq 450$  K, or  $\sim 2\text{--}3$  km above the tropical tropopause) of the stratospheric overworld. The concentration of  $\text{H}_2\text{O}$  in the overworld is strongly correlated to and controlled by tropical tropopause temperatures, via the freeze-drying of air across the tropical tropopause as part of the ascending branch of the Brewer–Dobson circulation (e.g., Randel and Park, 2019; Mote et al., 1996). Alternatively,  $\text{H}_2\text{O}$  in the LMS is impacted by both the downwelling branch of the Brewer–Dobson circulation and by frequent STE, specifically troposphere-to-stratosphere transport (TST; Holton et al., 1995; Stohl et al., 2003), though the contributions of specific processes is still not well understood.

At larger scales, enhancements in LMS  $\text{H}_2\text{O}$  concentrations can be linked to isentropic cross-tropopause transport. So-called “tropospheric intrusions” are driven by poleward Rossby wave breaking events and transport tropical upper troposphere air to the extratropical LMS across the tropopause break near the subtropical jet (Pan et al., 2009; Homeyer et al., 2011; Homeyer and Bowman, 2013; Ploeger et al., 2013; Langille et al., 2020). Note that while a small population of these events have been shown to substantially moisten the LMS, tropospheric intrusions are frequently related to decreases in LMS  $\text{H}_2\text{O}$  (Schwartz et al., 2015). Large-scale cross-tropopause transport can also be facilitated by isentropic **ascent** along the warm conveyor belts of midlatitude cyclones, which has been shown to transport  $\text{H}_2\text{O}$  and boundary-layer pollutants into the LMS (Roiger et al., 2011; Stohl, 2001; Wernli and Bourqui, 2002). Isentropic transport related to monsoon dynamics — which is intrinsically linked with smaller-scale monsoon convection — has also been shown to substantially contribute to LMS  $\text{H}_2\text{O}$  enhancements (e.g., Randel et al., 2010; Pan et al., 2016; Honomichl and Pan, 2020; Pan et al., 2022).

Tropopause-overshooting convection typically results in the most extreme **localized** stratospheric hydration. Both regional and global climatologies of deep convection show that convection overshoots the extratropical tropopause relatively frequently over land (**and occasionally reaches the stratospheric overworld**), especially in the Americas (Solomon et al., 2016; Cooney et al., 2018; Liu and Liu, 2016; Clapp et al., 2019; Liu et al., 2020; Homeyer and Bowman, 2021). While some studies identify a minimal role of convective contributions to stratospheric water vapor ( $\sim 10\%$ ), these are typically restricted in focus to tropical convection and impacts on the stratospheric overworld (e.g., Dauhut and Hohenegger, 2022; Ueyama et al., 2023, and references therein). Studies that focus on convection within extratropical environments, subtropical environments, and monsoon regions often show substantial contributions from convection to the LMS  $\text{H}_2\text{O}$  concentration locally (Hanisco et al., 2007; Dessler and Sherwood, 2004; Smith et al., 2017; Jensen et al., 2020; Tinney and Homeyer, 2021; Gordon and Homeyer, 2022; Phoenix and Homeyer, 2021; Homeyer et al., 2014; Hegglin et al., 2004; Mullendore et al., 2005; Schwartz et al., 2013; Werner et al., 2020; O’Neill et al., 2021). Overall, the contributions of any specific process to the stratospheric  $\text{H}_2\text{O}$  budget, especially deep convection, remains a topic of scientific debate.

An important instrument that has been frequently employed in studying **the** global LS H<sub>2</sub>O is NASA's Microwave Limb Sounder (MLS). For example, Schwartz et al. (2013) and Werner et al. (2020) use MLS observations to assess the global distribution of high H<sub>2</sub>O concentrations at a pressure level of 100 hPa, which is commonly found at a similar level to the 380 K isentrope. Both studies show that high H<sub>2</sub>O concentrations ( $\geq 8$  ppmv) are most frequent in monsoon-related active-convection regions and therefore contribute to the growing body of evidence suggesting that convection is a substantial contributor to LS H<sub>2</sub>O, especially at a regional level. However, such studies do not evaluate the frequency of H<sub>2</sub>O enhancements in the LMS, which can encompass a layer 5 km or deeper below the 100 hPa and 380 K levels (Holton et al., 1995). Higher MLS pressure levels have not been considered in previous studies due to large latitudinal and seasonal variations in tropopause heights complicating the diagnosis of LMS layers. Unfortunately, this choice is likely to lead to substantial underestimations of both the frequency and magnitude of enhanced **LMS** H<sub>2</sub>O concentrations. The potential for underestimation of convection-driven extrema specifically is expected to be impacted greatest since convection-driven enhancements are typically confined to only a few km above the tropopause (e.g., Tinney and Homeyer, 2021).

Therefore, this study intends to expand upon previous work by examining 16 years (2005–2020) of MLS H<sub>2</sub>O observations to create a climatology of H<sub>2</sub>O extrema in both the lowermost and overworld stratosphere. To achieve this, we use reanalysis data to diagnose whether individual layers in an MLS profile are stratospheric, allowing for accounting of observed LMS H<sub>2</sub>O extrema for the first time. Additional context is provided to these observations through an isentropic back-trajectory analysis of common transport pathways and discussion of the potential roles of large-scale vs. convective sources.

## 2 Data and methods

### 2.1 Reanalysis

Three-hourly assimilations of the global atmosphere are employed from the NASA Modern-Era Retrospective Analysis for Research and Applications, version 2 (MERRA-2; Gelaro et al., 2017). Temperature, pressure, potential vorticity (PV), and wind fields are used in this study. MERRA-2 lapse-rate tropopause (LRT) heights and pressures are calculated according to the World Meteorological Organization (WMO) definition (World Meteorological Organization, 1957). MERRA-2 is available from 1979–present on an approximate  $0.5^\circ \times 0.625$  longitude-latitude grid with 72 vertical model levels, which corresponds to  $\sim 1.1$  km vertical resolution in the UTLS.

### 2.2 Global H<sub>2</sub>O observations

Measurements of H<sub>2</sub>O in the UTLS are sourced from the Earth Observing System (EOS) Microwave Limb Sounder (MLS) v5.0x dataset. The MLS is aboard the Aura spacecraft as part of the NASA A-train constellation of sun-synchronous satellites, and has equator crossing times of 0130 and 1330 LT. The instrument performs a continuous vertical scan of the atmosphere (surface–90 km) in the forward direction of orbital motion, completing  $\sim 3600$  profiles per day with a  $1.5^\circ$  along-track separation between each scan (Livesey et al., 2020). Concentrations of 16 different trace gases have been collected globally by MLS

since August 2004. The MLS retrieval range of H<sub>2</sub>O is 316–0.001 hPa, with measurements at 12 levels per decade of pressure in the UTLS. The precision, accuracy, horizontal resolution and vertical resolution of the H<sub>2</sub>O measurement varies with height, ranging from 4–65%, 4–25%, 168–400 km, and 1.3–3.5 km, respectively, for pressures 316–1.0 hPa before degrading at lower pressures. Only MLS layers with pressures of 147 hPa and less are analyzed here, where the precision and accuracy of the measurement are more suitable for this study. The data is quality controlled following the recommendations of Livesey et al. (2020). The MLS v5.0x has a number of improvements from previous data versions, including partial amelioration of a calibration-related drift in the H<sub>2</sub>O measurement.

### 2.3 Stratospheric H<sub>2</sub>O extrema identification

MLS observations from 2005–2020 are utilized in conjunction with MERRA-2 data to assess the frequency of H<sub>2</sub>O extrema in the stratosphere. MERRA-2 LRT pressure, PV, and potential temperature ( $\theta$ ), are linearly interpolated in space and time to each MLS profile location, and logarithmically interpolated vertically to the individual layers of each MLS profile. These atmospheric parameters are then employed to diagnose whether any individual MLS layer is located in the stratosphere. **The most important aspect of this method is to balance the objective of retaining as many LMS observations as possible for analysis with the necessary condition that the identified stratospheric layers are free of tropospheric contamination (which would result in artificially high frequencies of stratospheric H<sub>2</sub>O extrema, especially in the LMS). This is particularly important due to the relative thickness of MLS layers and potential uncertainties in tropopause identification.**

Employing a singular criterion, like a requirement that MLS layers be above the LRT, proved to be insufficient as LRT errors along the tropopause break led to large swaths of non-physical extrema occurrences. Similarly, a single PV-based requirement showed clear tropospheric contamination in regions with frequent stratospheric intrusions (or tropopause folding events). Ultimately, a combination of multiple requirements is required to ensure that the limitations of any single stratospheric parameter do not lead to tropospheric contamination within the analysis. To determine appropriate thresholds for each requirement, the analysis was performed and subjectively evaluated with dozens of different threshold combinations until a suitable final set of criteria was selected. This criteria was chosen as it allowed for as many layers in the analysis as possible while still limiting tropospheric contamination (which is characterized by widespread, uniformly high frequencies of H<sub>2</sub>O extrema).

Therefore, based on rigorous testing and evaluation described above, we require that layers meet a set of three criteria to be classified as wholly stratospheric: (1)  $PV \geq 6$  PVU, (2)  $\log(P_{MLS}) \leq \log(P_{LRT}) - 0.075$  (i.e. the layer must be at least  $\sim 1$  km above the LRT), and (3)  $\theta \geq 340$  K. While these criteria are applicable in the mid- and high-latitudes, they are inappropriate for application to tropical profiles due to PV converging to zero in this region. Therefore, we also consider MLS layers to be stratospheric if  $\theta \geq 380$  K. As an upper limit for layers to be included in the analysis, we additionally require that layers have a  $\theta \leq 450$  K to restrict the analysis to lower stratosphere layers only. This set of stringent criteria allows us to analyze observations characteristic of the extratropical LMS and ensure that tropospheric contamination is minimized. **In a few rare circumstances, these criteria can be met within the deep tropics; an example of this is discussed in detail in Sect. 3.2.**

125 For analysis, **the wettest identified** stratospheric MLS layers **from each profile** are collected in 5° latitude-longitude bins  
(i.e., **only one layer from each profile is used**). The frequency of H<sub>2</sub>O extrema (exceeding a given threshold) in each bin  
are then calculated. To quantify how inclusion of the LMS impacts the distribution and frequency of extrema identification,  
the same binning process is completed for stratospheric overworld ( $\theta \geq 380$  K) observations only. Due to seasonal variation  
in the frequency, location, and magnitude of stratospheric H<sub>2</sub>O extrema, analysis is conducted separately for DJF (December,  
130 January, February), MAM (March, April, May), JJA (June, July, August), and SON (September, October, November) when  
necessary.

## 2.4 Trajectory analysis

To provide context to the LMS H<sub>2</sub>O extrema climatology, large-scale transport characteristics are explored via isentropic tra-  
jectory analyses. Trajectories are initialized at the latitude, longitude, and  $\theta$  of stratospheric H<sub>2</sub>O extrema that occur within  
135 eight identified high-frequency regions shown in Fig. 1. Using the TRAJ3D trajectory model (Bowman, 1993; Bowman and  
Carrie, 2002), particles are advected backward in time using MERRA-2 winds for up to 10 days, with positions saved every 6  
hours along the trajectory path. Two-dimensional (latitude-longitude) frequency distributions of trajectory particle locations at  
multiple time intervals are used to identify common pathways to regions of frequent extrema. Given the MERRA-2 spatiotem-  
poral resolution and wind field uncertainties, horizontal displacement errors of individual trajectories are expected to be ~60  
140 km per day (Bowman et al., 2013; Stohl et al., 1995), but these errors are largely irrelevant for examining the bulk transport  
behavior sought here. Evaluating the recent history of identified H<sub>2</sub>O extrema air masses helps to provide context for their  
potential (or likely) sources.

## 2.5 Observations of convection

Observations of tropopause-overshooting convection are sourced from NASA’s Global Precipitation Measurement (GPM)  
145 mission. The GPM core satellite was launched in 2014 and is able to measure precipitation characteristics in three dimen-  
sions, allowing for the detection of precipitation features from the tropics to the middle- and high-latitudes (Hou et al., 2014;  
Skofronick-Jackson et al., 2017; Nesbitt et al., 2000; Liu et al., 2008). These precipitation features can be used in combination  
with tropopause altitudes to identify overshooting convection. We use an extended record (2015–2020) of GPM overshoots that  
was originally produced for and analyzed in Liu et al. (2020), which has been updated to use the newer ECMWF Reanalysis  
150 Version 5 (ERA 5) LRT as a reference (Hersbach et al., 2020). Any precipitation feature (radar echo >20 dBZ) found at an  
altitude above the ERA5 LRT altitude is classified as an overshoot. We use the resulting seasonal geographic distributions of  
overshoot frequency to provide context for the transport analysis in this study.

## 3 Results

The analysis presented here was completed for three different thresholds of H<sub>2</sub>O extrema (8, 10, and 12 ppmv). **As expected,**  
155 **the frequency of extrema identification decreases as the threshold increases. In general, the choice of threshold does not**

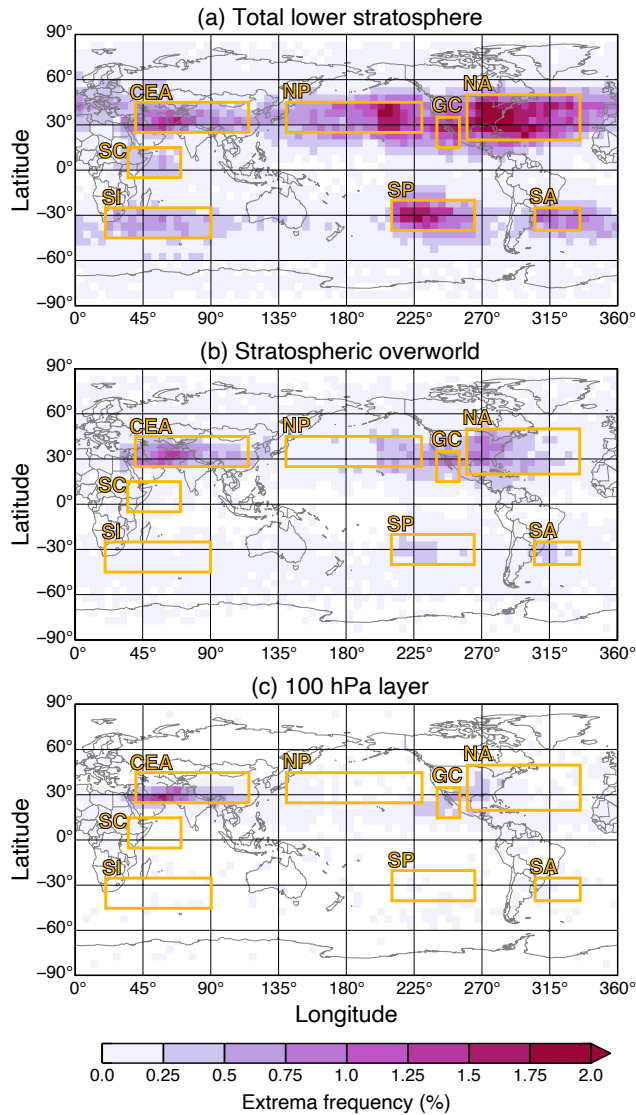

**Figure 1.** Binned frequency of H<sub>2</sub>O extrema ( $\geq 8$  ppmv) as observed by MLS for (a) layers classified as stratospheric, (b) overworld layers only, and (c) the 100 hPa layer only. Eight local maxima are classified into regions (gold) for further analysis.

have a substantial impact on the global and seasonal distributions of extrema. For simplicity, we therefore present here the results for H<sub>2</sub>O extrema exceeding 8 ppmv **only**, as this is the most commonly used extrema threshold in prior work **and** provides the largest sample of extrema for analysis. Relevant discussion of sensitivities to the extrema threshold can be found in Sect. 4.

### 160 3.1 Extrema frequency

The frequency of H<sub>2</sub>O extrema in the total LS (overworld + LMS) and the overworld only are shown in Fig. 1a,b. Over most of the world, H<sub>2</sub>O concentrations exceeding 8 ppmv in the stratospheric overworld occur less than 0.25% of the time. There are six notable geographic features where the frequency of extrema maximizes which we highlight and subjectively classify into regions here: Central and Eastern Asia (CEA), the North Pacific (NP), the South Pacific (SP), the Gulf of California (GC), 165 North America and the North Atlantic (NA), and finally South America and the South Atlantic (SA). The maximum frequency of overworld H<sub>2</sub>O extrema in each of these regions varies from ~0.25–1.25%. The CEA feature is the most pronounced in its spatial extent and magnitude, followed closely by the NA feature.

When this analysis is extended to include the LMS, the magnitude and spatial extent of nearly every feature increases, although the strength of the frequency change is variable across the domain (Fig. 1a). The NA, GC, NP, and SP maxima 170 experience the greatest increases in frequency magnitude, exceeding 2% in some locations which is more than double that of their overworld counterparts. The SA feature displays a modest increase in frequency, with a maximum frequency of 1.25%. Notably, the magnitude of extrema in the CEA region is minimally impacted by the inclusion of the LMS, **which** results in the central Asia maximum being one of the least pronounced features in the total LS, despite being the dominant region in the overworld only analysis. **This result is consistent with previous work showing that tropopause heights are anomalously** 175 **high in the region/season of the Asian Monsoon Anticyclone, leading to a shallow — or non-existent— LMS in this region (Munchak and Pan, 2014).** There are also two additional maxima that become apparent with the inclusion of the LMS: along and just east of the Somalian Coast (SC), and over the Southern Indian Ocean (SI). These features were not detectable in the overworld only analysis where, like in much of the rest of the world, the occurrence of H<sub>2</sub>O extrema did not exceed a frequency of 0.25%. However, these maxima become comparable to the CEA feature in the total LS analysis, 180 with extrema frequencies reaching up to ~1%. In addition to changes in the magnitude of H<sub>2</sub>O extrema frequencies in the total LS analysis for most features, the spatial extent of most features increases as well. Specifically, the features tend to be elongated zonally from their position in the overworld. This can most clearly be seen in the NA and SA features extending eastward over the Atlantic, and the NP feature extending westward to far-eastern Asia. **This pattern of local extrema hot-spots followed by downstream plumes of decreasing frequency is reasonable given typical mixing timescales (5–7 days;** 185 **Homeyer et al., 2011) and average LS zonal flow. Put simply, a large initial H<sub>2</sub>O enhancement can be detectable for days as it is transported downstream before being fully mixed into the background stratosphere. Finally, it is important to note that all** regions were subjectively chosen based on the locations of maxima in the total lower stratosphere analysis.

The prominent features over North America (both the NA and GC regions), Asia (the CEA region), and South America (the SA region) have been seen in previous studies of MLS H<sub>2</sub>O extrema at the 100 and 82.5 hPa levels, and have been linked 190 to convective sources associated with the monsoon anticyclone circulations on these continents (e.g., Werner et al., 2020; Schwartz et al., 2013). **In contrast**, the maxima over the north and south Pacific (the NP and SP regions), and over the Indian Ocean (the SC and SI regions) have never been identified. This, combined with no **major** local convective **features identified in previous analyses (e.g., Liu et al., 2020)**, may lead to some concerns that this result could be a nonphysical artifact of

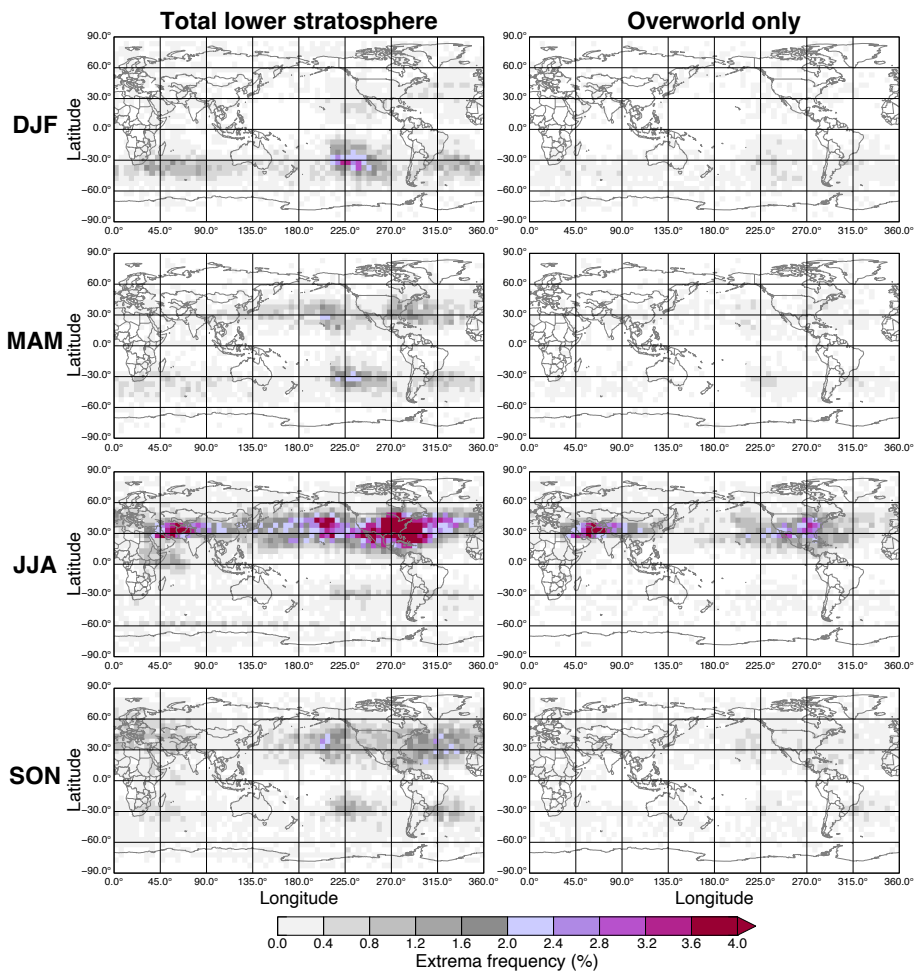

**Figure 2.** Binned frequencies of MLS H<sub>2</sub>O extrema ( $\geq 8$  ppmv) separated seasonally into December, January, and February (DJF; top row), March, April, and May (MAM; second row), June, July, and August (JJA; third row), and September, October, and November (SON; bottom row) for (left) **lower** stratospheric layers and (right) stratospheric overworld layers only.

or error in the analysis. For this reason, we also apply our analysis to the 100 hPa layer only to allow for a comparison to  
 195 previous work (Fig. 1c). These results are nearly identical to those shown in Werner et al. (2020) and Schwartz et al. (2013),  
 with minor differences likely accounted for by the length of the MLS record used, bin sizes, and previous choices to exclude  
 certain anomalous events that were not made here. Most importantly, the NP, SP, SC, and SI are not found in our 100 hPa only  
 analysis. The similarity of the analysis presented here to the results in Schwartz et al. (2013) and Werner et al. (2020) provide  
 confidence that the previously unseen features are not due to analysis error, but rather due to the inclusion of additional MLS  
 200 layers that can be classified as stratospheric. However, the presence of the LMS in the deep tropics where the SC region is



located is — by definition — non-existent, which leads to a question of how the total LS analysis indicates a local maxima over this region when it is not present in the stratospheric overworld. This is investigated further in the transport analysis below.

The seasonal breakdown of the H<sub>2</sub>O extrema patterns are shown in Fig. 2. In the Northern Hemisphere, JJA dominates the annual cycle in both the total LS and the overworld. In the NA and NP regions, the frequency of H<sub>2</sub>O extrema in JJA far surpasses that of any other season, with more than 4% of total LS observations exceeding 8 ppmv. The westward extent of NP maxima seen in Fig. 1 is even more evident when restricted to JJA only. MAM and SON have modest contributions to Northern Hemisphere extrema and are most substantial over the NP and NA regions, while DJF (boreal winter) frequencies are < 0.4% across nearly the entire Northern Hemisphere. The significance of the Asian Monsoon Anticyclone is made apparent in the total LS seasonal analysis where the CEA maxima is pronounced in JJA, while other features — such as NA maxima — are present in all seasons except for DJF. In the stratospheric overworld, however, locations over CEA and the NA regions exceed an extrema frequency of 0.8% in JJA only.

In the Southern Hemisphere, DJF (austral summer) has the most prominent contribution to both LS and overworld extrema, though the overall annual cycle is far less clear than that of the Northern Hemisphere. The SP region is the dominant feature of the DJF analysis, with frequencies exceeding 2–3% throughout the region. The SI and SA maxima are also noticeable in the DJF total LS analysis, though their frequencies remain below 1.6%. Similar to their contributions in the Northern Hemisphere, MAM and SON feature modest frequencies of H<sub>2</sub>O concentrations exceeding 8 ppmv in the Southern Hemisphere, with the maximum over South America being the only notable feature in addition to that over the Pacific. Finally, Southern Hemisphere extrema in JJA (austral winter) are exceedingly rare.

### 3.2 Transport characteristics

To provide context to the extrema observations described above, we investigate the recent transport behavior of all LS H<sub>2</sub>O extrema located in the eight regions identified in Fig. 1 via an isentropic backwards trajectory analysis for the season in which the feature is most pronounced. This analysis serves as a compliment to the extrema climatology presented above and allows us to investigate potential sources of extreme LS H<sub>2</sub>O. We show here and discuss in detail the statistical transport for a well-known H<sub>2</sub>O frequency maximum (the CEA region), and two unexpected maxima (the NP and SC regions). The transport analyses for the remaining regions are located in the appendix.

The statistical transport behavior of H<sub>2</sub>O extrema located in the CEA region during JJA is shown in Fig. 3. Throughout the 10 day history, the vast majority of trajectory particles remain over Asia indicating that the extrema air has been confined within the summertime Asian Monsoon anticyclone throughout its recent history. As expected, and consistent with previous studies (e.g., Bergman et al., 2013; Khaykin et al., 2022), this demonstrates that the frequent high LS H<sub>2</sub>O concentrations over this region are related to a combination of monsoon dynamics and convection. It is important to note, however, specific convective moistening of the particles along the trajectory path may have occurred before or at any time during the preceding 10 day period, as convective transport is not captured by these large-scale isentropic trajectories. For the NP maxima, transport is largely zonal along the subtropical jet axis (Fig. 4). At 4 days prior to the extrema observation, the highest density area of trajectory particles is located over active overshooting convection areas across Asia, Siberia, and southern Russia as observed

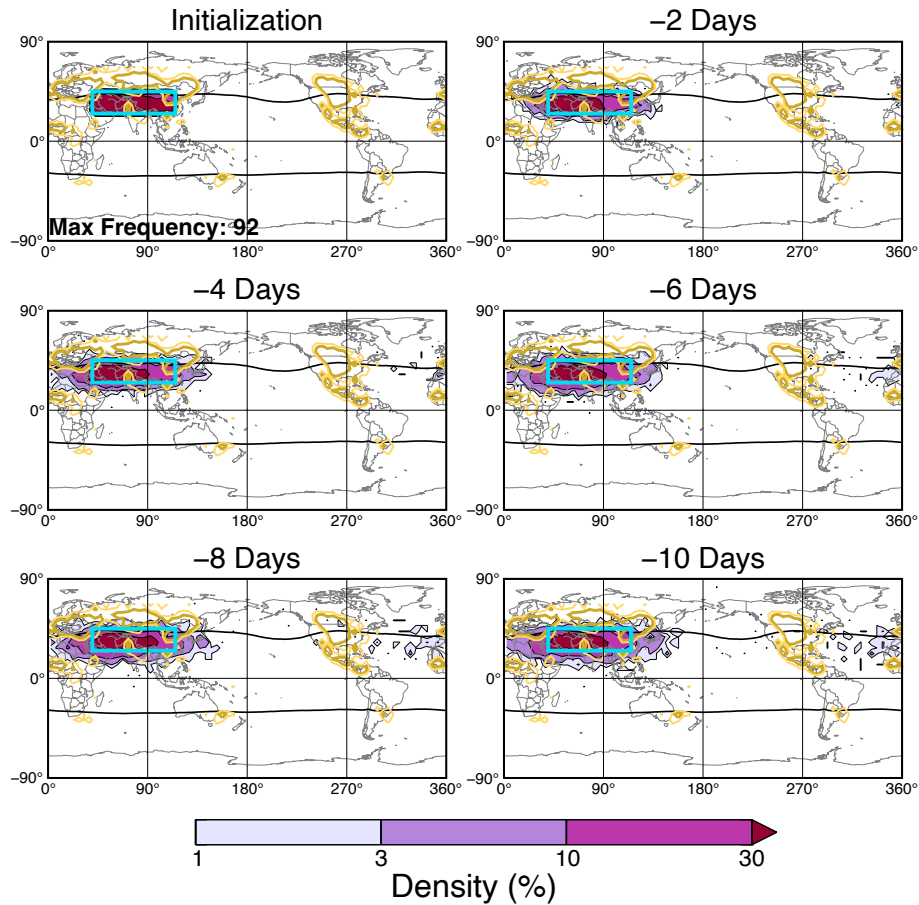

**Figure 3.** Isentropic backwards trajectory analysis for H<sub>2</sub>O extrema in the CEA region (blue box) in JJA. The normalized density of trajectories at initialization and at 2, 4, 6, 8, and 10 days prior is shown by the color-fill, with the maximum density value given in the initialization panel. The seasonal frequency of tropopause-overshooting convection as detected by GPM is given by the golden contours at intervals of  $5 * 10^{-5}$  overshoots per observation (lighter gold) and  $10 * 10^{-5}$  overshoots per observation (darker gold). The seasonal average tropopause break (i.e. the location of the sharp discontinuity between tropical and extratropical tropopause heights) for each hemisphere is indicated by the solid black line.

235 by GPM, suggesting that convective moistening is a likely contributor to these extrema. A smaller, but still substantial, portion of trajectories trace back **eastward** to Central American convection 4 to 6 days prior. As demonstrated in Figs. 1 and 2, the frequency of H<sub>2</sub>O extrema in the eastern half of the defined NP region is approximately double that of the western half. This transport analysis suggests that Central American convection related to the North American Monsoon Anticyclone is at least partly responsible for the high frequency of extrema over the eastern North Pacific, **which is consistent with recent**  
 240 **work (Clapp et al., 2021)**. Another potential source for high LS H<sub>2</sub>O concentrations over the NP worth investigating would be poleward Rossby wave breaking transport of tropical/subtropical upper troposphere air. The north Pacific is a location

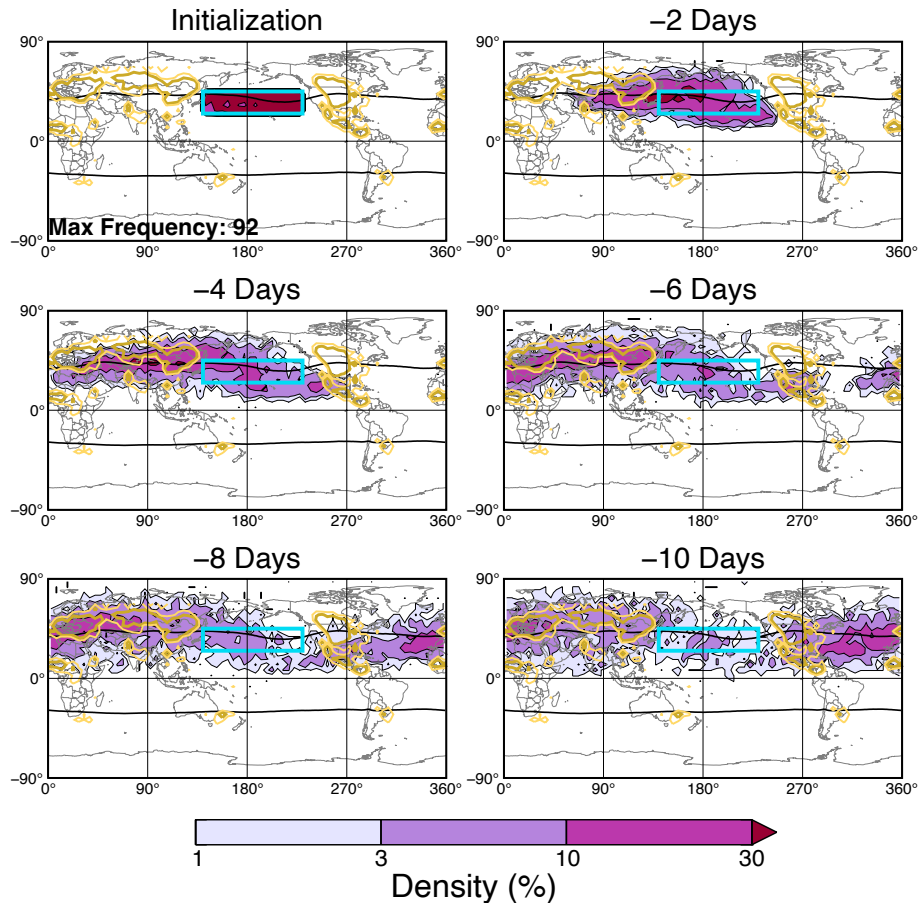

**Figure 4.** As in Fig. 3, but for the NP region in JJA.

of frequent Rossby wave breaking (Homeyer and Bowman, 2013), and poleward wave breaking has the potential to transport relatively moist, tropical upper tropospheric air into the lowermost stratosphere and contribute to this maximum (Langille et al., 2020). However, the lack of substantial meridional transport from the tropics (i.e., equatorward of the average tropopause break  
 245 latitude) related to the observed extrema, outside of the aforementioned path from Central America, suggests that this method of stratospheric hydration may be limited when it comes to H<sub>2</sub>O concentrations exceeding 8 ppmv.

Finally, the transport history of the SC local maximum is shown in Fig. 5. As mentioned above, the existence of relatively high frequencies of H<sub>2</sub>O extrema in the SC region in the total LS analysis, but not the overworld only analysis, is theoretically impossible, as the LMS does not exist in the deep tropics. The transport behavior indicates that this air largely originates from  
 250 southeast Asia as recently as two days prior, and was located within the monsoon circulation for the preceding 10 days. The path of these trajectories largely resembles equatorward wave breaking of midlatitude LMS air along the eastern portion of the monsoon anticyclone shown in previous studies (e.g., Konopka et al., 2010). The transport of this air into the deep tropics would retain some characteristics of its source region for up to 1 week, namely higher PV and potential temperature, which is

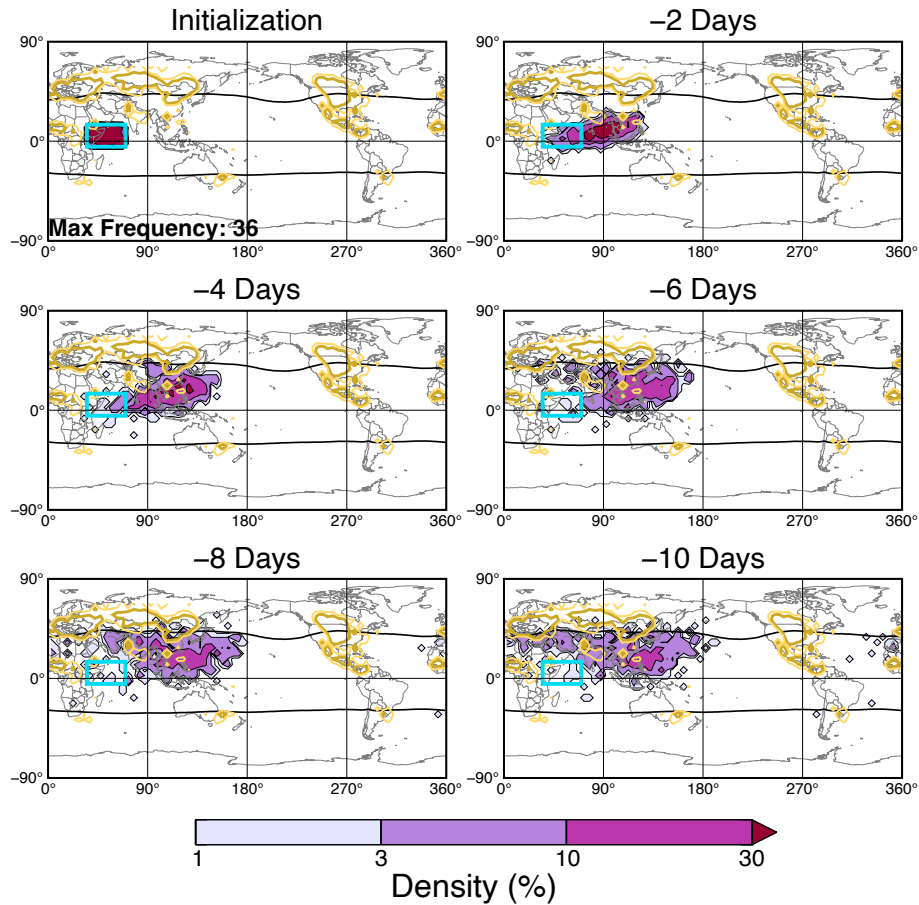

**Figure 5.** As in Fig. 3, but for the SC region in JJA.

likely what allows for this air to meet the threshold requirements set here and identify it as LMS though it is encompassed by  
 255 tropical upper troposphere air. Additionally, LRT altitudes in this region are frequently identified lower than in other regions  
 located along the same latitude band (not shown), again suggesting a modification confined to this region due to monsoon  
 dynamics.

To provide additional insight into the potential sources of LS H<sub>2</sub>O extrema, we can analyze the cross-tropopause transport  
 nature of the isentropic trajectories to assess the likelihood of large-scale moistening (rather than delivery by tropopause-  
 260 overshooting convection). As a proxy for large-scale isentropic TST, the percentage of trajectories that spent at least 72 of  
 the 120 hours prior to extrema observation within the troposphere in each season is shown in Fig. 6. The seasonal variation  
 of large-scale TST at any given location appears minimal. However, it is important to note that for each season, data is only  
 shown for bins with at least 20 initialized trajectories, which could obscure seasonal variation from this analysis. In general,  
 locations over the south Pacific, southern Indian Ocean, the Somalian coast, and the Asian Monsoon region more frequently

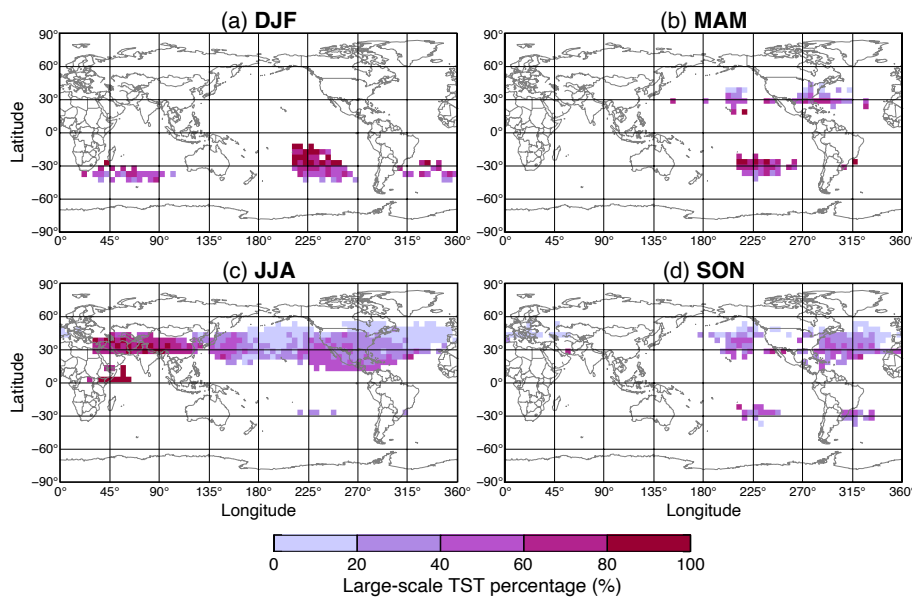

**Figure 6.** The binned percentage of H<sub>2</sub>O extrema trajectories classified as large-scale TST at their initialized location for (a) DJF, (b) MAM, (c) JJA, and (d) SON. **To restrict the analysis to bins with sufficient sampling of extrema, percentages are only shown for bins with  $\geq 20$  observations for the corresponding season.**

265 ( $\geq 60\%$ ) indicate recent large scale TST, while the northern Pacific and North America have much lower large-scale transport percentages ( $< 40\%$ ).

The higher frequency of large-scale TST over the Asian monsoon region ( $> 80\%$  in some places) is consistent with recent studies that have shown the importance of monsoon dynamics in stratospheric moistening over Asia, where monsoon convection often moistens the upper troposphere but additional monsoon-driven isentropic cross-tropopause transport is required to extend these impacts to the stratosphere (e.g., Randel et al., 2010; Pan et al., 2016; Honomichl and Pan, 2020; Pan et al., 2022). Alternatively, the lower percentages common throughout the rest of the Northern Hemisphere subtropics and extratropics suggest that direct convective moistening via overshooting is the primary driver of these extreme concentrations. In some locations, like over North America extending eastward into the North Atlantic, this adds to the body of work which have shown that convection over North America is particularly capable of moistening the lowermost stratosphere (e.g., Randel et al., 2012; Tinney and Homeyer, 2021).

On the other hand, the low frequencies of large-scale TST for the summertime band of extrema from  $180\text{--}225^\circ\text{E}$  Longitude over the northern Pacific is somewhat surprising given that this is a location of frequent Rossby wave breaking in boreal Summer (Homeyer and Bowman, 2013). However, this is in line with the analysis shown in Fig. 4 which has a lack of meridional transport from the tropics outside of a pathway from summertime transport from Central American convection, which suggests poleward Rossby wave breaking is not a substantial contributor for LS H<sub>2</sub>O concentrations greater than 8 ppmv. The significance of the contribution of Rossby Wave breaking events to stratospheric H<sub>2</sub>O concentrations has been debated in previous

work (e.g., Ploeger et al., 2013). The analysis above suggests that while horizontal transport events between the tropical upper troposphere and extratropical LS via Rossby wave breaking may be common in this location, the air involved in associated TST is not moist enough to substantially contribute to the populations of H<sub>2</sub>O extrema analyzed here.

### 285 3.3 Annual cycles in monsoon-related regions

**Monsoon dynamics and circulations have a unique and substantial impact on LS H<sub>2</sub>O extrema. The seasonal nature of monsoon circulations motivates additional** analysis of the annual cycle of LS H<sub>2</sub>O extrema in monsoon-related regions, **with a goal of providing further insight to the relationship between monsoon circulations and LS H<sub>2</sub>O extrema.** In particular, we focus in the Asian Monsoon Anticyclone (AMA; 20°N – 40°N, 30°E – 130°E), the North American Monsoon Anticyclone (NAMA; 20°N – 45°N, 230°E – 290°E), and the South American Monsoon Anticyclone (SAMA; 20°S – 40°S, 260°E – 320°E). Note that these region boundaries are different from those defined and discussed previously, as those were subjectively chosen based on local maxima of LS H<sub>2</sub>O extrema frequency and do not necessarily align with the tropopause-level monsoon circulations. These monsoon regions, shown in Fig. 7d, were specifically chosen to encapsulate their associated **tropopause-level** anticyclonic circulations as indicated by the climatological mean of hemispheric summer 100 hPa winds in reanalysis (not shown).

While the frequency of H<sub>2</sub>O extrema peaks in summer and decreases in winter for each monsoon anticyclone, the characteristics of each cycle vary substantially. Both when normalizing for region size (Fig. 7a) and not (Fig. 7b), the frequency of LS H<sub>2</sub>O extrema in AMA and NAMA are an order of magnitude larger than in SAMA at their respective peaks. The SAMA annual cycle is characterized by a broad, shallow peak from October to January (hemispheric Spring and Summer) with a maximum average of ~0.2 observations per gridpoint. For NAMA the occurrence of LS H<sub>2</sub>O extrema largely exists between April and October (hemispheric late Spring to early Fall), peaking in August at a maximum average of ~1.7 observations per gridpoint. Alternatively, AMA extrema primarily exist within boreal summer (JJA) and peak in July at ~1.0 observations per gridpoint. From a per gridpoint standpoint, the NAMA region clearly dominates contributions to LS H<sub>2</sub>O extrema both in magnitude of the frequency and the longevity **compared to AMA and SAMA, likely as a result of combined contributions** **from monsoon-driven deep convection near the Sierra Madre mountains in northwest Mexico and additional frequent convection in the central and eastern United States during spring, summer, and fall.** When comparing the monsoons as a whole and allowing for their size to modulate their contributions, the NAMA region still exhibits the greatest H<sub>2</sub>O extrema frequency, though AMA is more comparable in the total number of extrema observations (Fig. 7b). Perhaps even more notable is the disparity between the proportion of total LS versus overworld only extrema in each region. For NAMA and SAMA, the overall overworld contributions to the total LS extrema frequency is less than 50%, while more than 90% of AMA LS H<sub>2</sub>O extrema are from the stratospheric overworld, **which reflects the anomalously high tropopause heights in this region (Munchak and Pan, 2014).** This result especially highlights the importance of considering the LMS when assessing the contributions of each monsoon to extreme H<sub>2</sub>O concentrations.

Figure 7 also shows the percentage of extrema in each monsoon region whose back trajectory analysis indicates a recent tropospheric origin (as described above). Again, there are substantial differences between the three monsoons. For AMA and

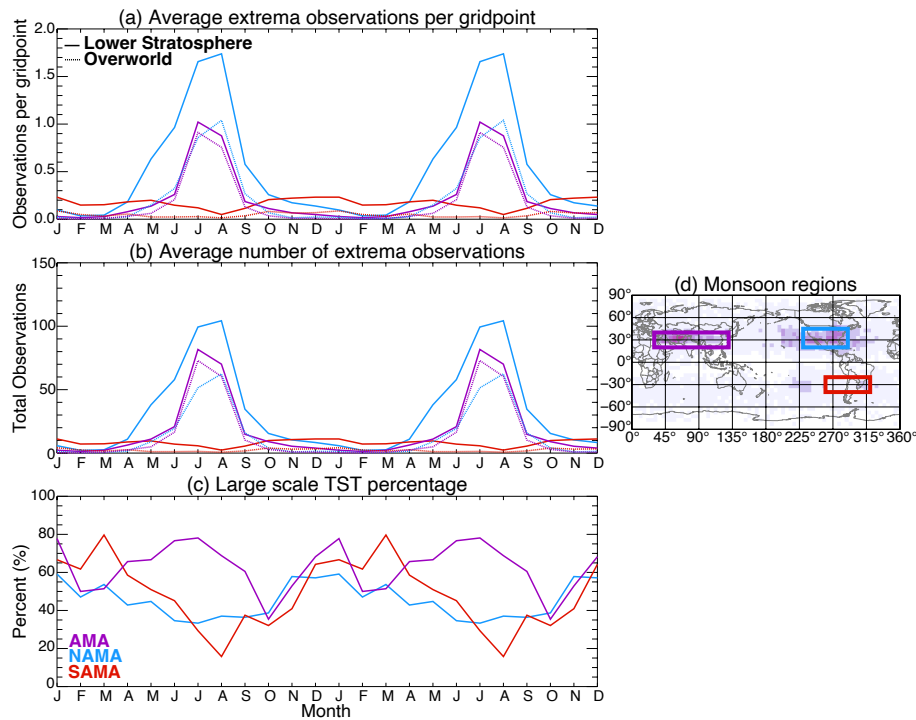

**Figure 7.** Two average annual cycles of (a) the number of H<sub>2</sub>O extrema per gridpoint, (b) the average regional number H<sub>2</sub>O extrema, and (c) the percentage of extrema with a large-scale transport history are given for the Asian Monsoon Anticyclone (AMA; 20°N – 40°N, 30°E – 130°E; purple), the North American Monsoon Anticyclone (NAMA; 20°N – 45°N, 230°E – 290°E; blue) and the South American Monsoon Anticyclone (SAMA; 20°S – 40°S, 260°E – 320°E; red). For (a) and (b), the number of observations for the total lower stratosphere is given by the solid line and the number of observations in the stratospheric overworld only is given by the dotted line. The region boundaries for each monsoon described above are given in (d).

SAMA, the large-scale TST percentage peaks during the monsoon season when the frequency of extrema peaks. Alternatively, the NAMA region experiences a minimum in large-scale TST percentage in August when the H<sub>2</sub>O extrema frequency peaks, providing more evidence that convection in the NAMA region is uniquely capable of transporting H<sub>2</sub>O to the LS without necessitating some additional, larger-scale transport, as has been demonstrated in previous studies (e.g., Randel et al., 2012; Tinney and Homeyer, 2021). **Both the AMA and NAMA regions also experience a relative maxima in the frequency of large-scale TST in December/January, which is likely a result of the substantial decrease in tropopause-overshooting convection in the winter months.**

## 4 Conclusions

MLS observations from 2005–2020 were used in conjunction with MERRA-2 reanalysis data to create a climatology of H<sub>2</sub>O  
325 extrema (>8 ppmv) in the stratospheric overworld and in the total LS (overworld + LMS). We show that the frequency and  
distribution of H<sub>2</sub>O extrema in the total LS (**0.27% of MLS total LS observations** globally) is dramatically different from that  
of the stratospheric overworld (**0.08% of MLS overworld observations** globally), revealing that the frequency of LS extrema  
increases by more than 300% when the LMS is included in **the** analysis. On both a yearly and seasonal basis, the frequency  
of extrema in the total LS analysis is substantially greater than that of the stratospheric overworld, but the magnitude of the  
330 difference varies by region (Figs. 1 and 2).

To provide additional context to this climatology, a statistical transport analysis was conducted by initializing isentropic  
trajectories at the latitude, longitude, and  $\theta$  of H<sub>2</sub>O extrema (Figs. 3–5, A1–A5). The transport analysis reveals two main  
transport patterns: (1) air being traced to or confined within monsoon circulations (i.e. the CEA, SC, NA, and GC regions;  
Figs. 3, 5, A1, and A3) and (2) largely zonal transport along the tropopause break via subtropical jet streams (the NP, NA, SA,  
335 SP, and SI regions; Figs. 4, A1, A2, A4, and A5). For all regions, the large-scale transport pathways indicate that the extrema  
air can be traced to regions of relatively frequent tropopause-overshooting convection. This analysis also reveals that, **outside  
of monsoon-related circulations**, meridional transport from the tropics to the observed H<sub>2</sub>O extrema is infrequent. To further  
investigate the potential origins of H<sub>2</sub>O extrema, the cross-tropopause nature of the isentropic trajectories was also investigated  
**by using the percentage of trajectories with recent history within the troposphere as a proxy for large-scale isentropic**  
340 **TST** (Fig. 6). The percentage of trajectories classified as being related to large-scale TST is regionally dependent, notably  
showing low occurrences of large-scale TST over the NP, NA, and GC regions — providing further evidence of convection  
serving as the major source of H<sub>2</sub>O extrema in those regions. In regions where large-scale TST is more frequent, it remains  
unknown whether convection upstream is coupled to such extrema. Namely, moist air that is transported isentropically to the  
LS may be related to upstream convective sources that acted to hydrate the upper troposphere prior to the large-scale TST.

345 Finally, the annual cycles of extrema frequency were investigated for regions encompassing the AMA, the NAMA, and the  
SAMA (Fig. 7). The LS frequency of H<sub>2</sub>O extrema in the AMA and NAMA regions were shown to be an order of magnitude  
larger than that of the SAMA. Additionally, while the AMA and NAMA have similar overworld extrema frequencies throughout  
the annual cycle, the magnitude and duration of peak extrema frequencies for the NAMA increases substantially with the  
inclusion of the LMS in the total LS analysis, compared to a small increase for the AMA. The results presented above highlight  
350 the importance of the including the LMS in analyses of LS composition. The frequency, geographic extent, and longevity of  
extrema are all substantially larger in the total LS analysis compared to the overworld. Additionally, the transport analysis  
strongly suggests that convection is a substantial contributor to the occurrence of LS H<sub>2</sub>O extrema, which may not have been  
clear if conducted for the overworld only.

**Throughout this study, several choices and assumptions were necessary for conducting the analysis. For example,**  
355 **using the tropopause-relative location of trajectories as a proxy for large-scale TST can be sensitive to the requirements  
for the percentage of time spent in the troposphere. In addition to the requirement used here (60% of the preceding 5**



days spent in the troposphere), the analysis was performed requiring that trajectories must be located in the troposphere for only 40% of the preceding 5 days. This changed the number of trajectories but did not impact the resulting large scale pathways (not shown). Additionally, while the analysis was conducted for MLS extrema thresholds of 8, 10, and 12 ppmv, only the 8 ppmv results were presented here. In general, the 8 ppmv threshold increased the number of extrema in all regions and all seasons compared to the more restrictive thresholds. For example, 8 ppmv extrema are typically ~1–2 times more frequent than 10 ppmv extrema globally. However, the 8 ppmv threshold does disproportionately increase the number of extrema in the CEA/AMA region, where 8 ppmv extrema are ~3–4 times more frequent than 10 ppmv extrema (not shown). Another sensitivity to the choice of threshold is found when examining the annual cycle of extrema in the NH, where 10 and 12 ppmv extrema frequency peaks in July while 8 ppmv extrema frequency peaks in August (not shown). This slight seasonal shift is likely related to the increase in background stratospheric water vapor concentrations in the summer months (e.g., Tinney and Homeyer, 2021). Though these sensitivities are notable, they do not impact the conclusions from the analysis.

Lastly, the biggest challenge for this work arose from the major goal of this study — to expand on previous work through the inclusion of the LMS in analysis of LS composition. Restricting the analysis to stratospheric MLS layers only proved to be a difficult task due to the relatively coarse vertical resolutions of MLS and MERRA-2. For this study, the selected criteria were as lenient as possible while still accounting for the uncertainties within the data. Specifically, to limit contamination from MLS layers whose depth may extend across the tropopause, a series of stringent criteria were put in place and only MLS layers at pressures of 147 hPa were included in this analysis. Despite these efforts, it is possible that upper-tropospheric H<sub>2</sub>O could influence parts of the analysis and partially inflate LS extrema frequencies. Alternatively, the stringent criteria may also obscure and prevent truly lower stratospheric layers from being included within this analysis — therefore potentially undercounting extrema. We emphasize here that the inclusion of the LMS in analyses like that presented here is challenging — but worthwhile — and is important to do in future work that aims to increase understanding of the concentrations and sources of H<sub>2</sub>O and other trace gases in the LS, especially given the implications for understanding the role of tropopause-overshooting convection in the STE budget.

*Data availability.* All data used in this study are publicly available. MLS and MERRA-2 data were obtained from the NASA GES DISC (Lambert et al., 2020; Global Modeling and Assimilation Office (GMAO), 2015). The processed GPM precipitation feature data used in this study are available online at <http://atmos.tamucc.edu/trmm/data/>.

## Appendix A

The statistical backward trajectory transport analysis described and shown for the CEA, NP, and SC regions in the main text is presented and briefly discussed here for the remaining regions. Figures A1–A3 show back trajectory density maps for H<sub>2</sub>O extrema in the NA, SA, and GC regions. These regions are all characterized by rapid transport of extrema observations to active

overshooting convection regions upstream and spatially adjacent to the extrema locations, implying that MLS is capturing H<sub>2</sub>O enhancements from convection at times shortly after the storms. For the NA region, overshooting over the U.S. Great Plains, Gulf of Mexico, and — at longer transport times — the Mediterranean, are likely contributors (with significance in that order). For the SA region, overshooting in Argentina is most likely responsible. For the GC region, overshooting over the Sierra Madre Occidental in Mexico and the Gulf of Mexico are likely contributors. In contrast with these apparently dominant local convective sources, transport pathways of H<sub>2</sub>O extrema in the SP region (Fig. A4) are not linked to a clear overshooting source region, but are densely sourced from the equatorward side of the mean tropopause break location. This behavior suggests that much of the H<sub>2</sub>O extrema in that region are facilitated in part by large-scale TST. It is noted, however, that SP extrema transport bypasses the South Pacific Convergence Zone (SPCZ), which is one of the more globally active convective regions in DJF (when SP extrema are most common; Vincent, 1994, and references therein). Thus, it is possible that H<sub>2</sub>O extrema in this region are the result of large-scale transport of UT air hydrated by convection over the SPCZ to the LS over the east Pacific. Finally, transport histories for H<sub>2</sub>O extrema within the SI region (Fig. A5) indicate rapid linkages to two upstream overshooting convection sources along the mean tropopause break location (i.e., the subtropical jet) within 2–4 days: southern Africa and Argentina.

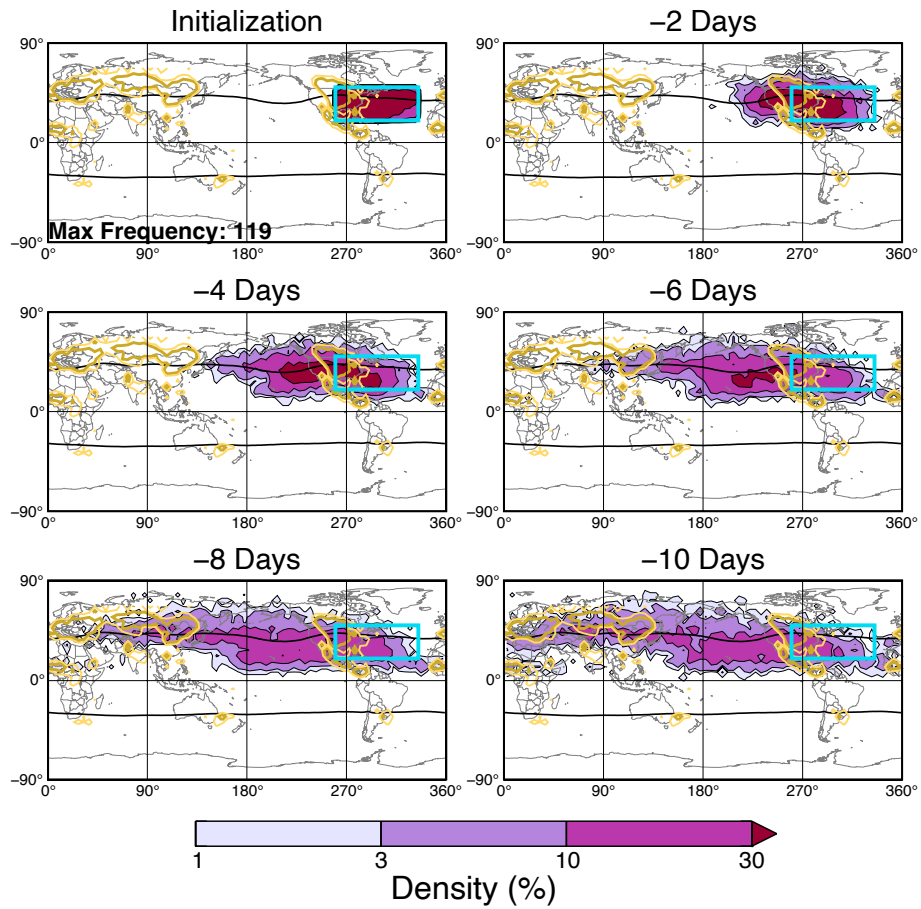

**Figure A1.** As in Fig. 3, but for the NA region in JJA.

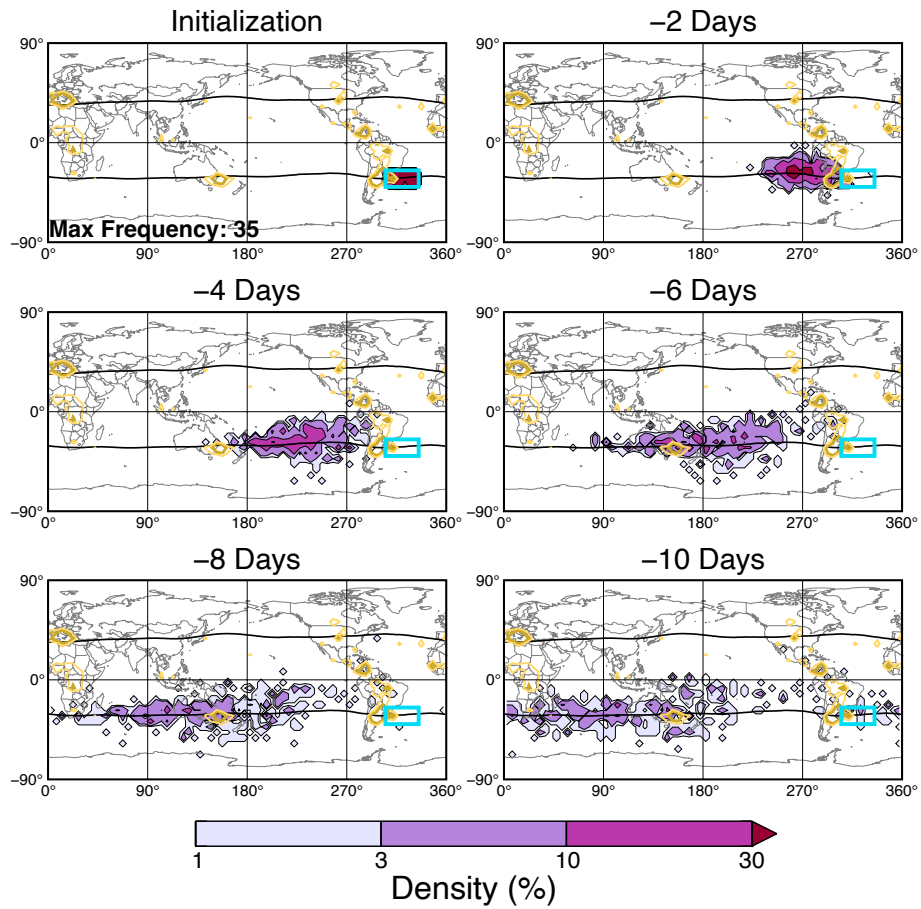

**Figure A2.** As in Fig. 3, but for the SA region in SON.

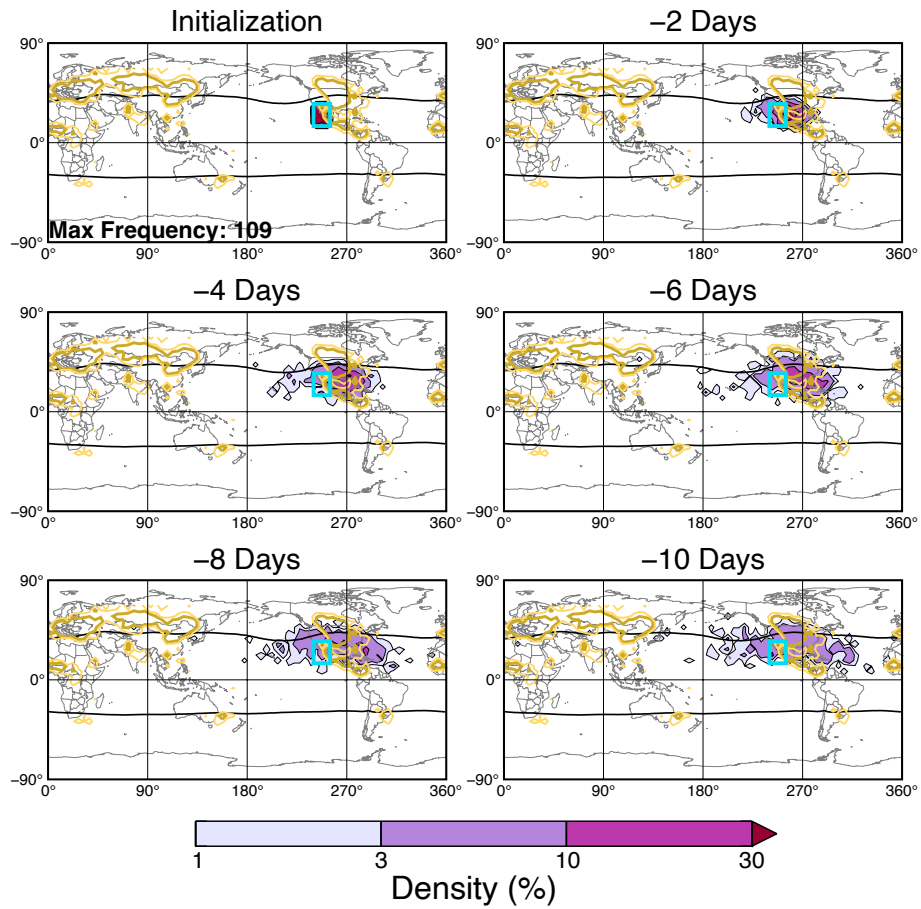

**Figure A3.** As in Fig. 3, but for the GC region in JJA.

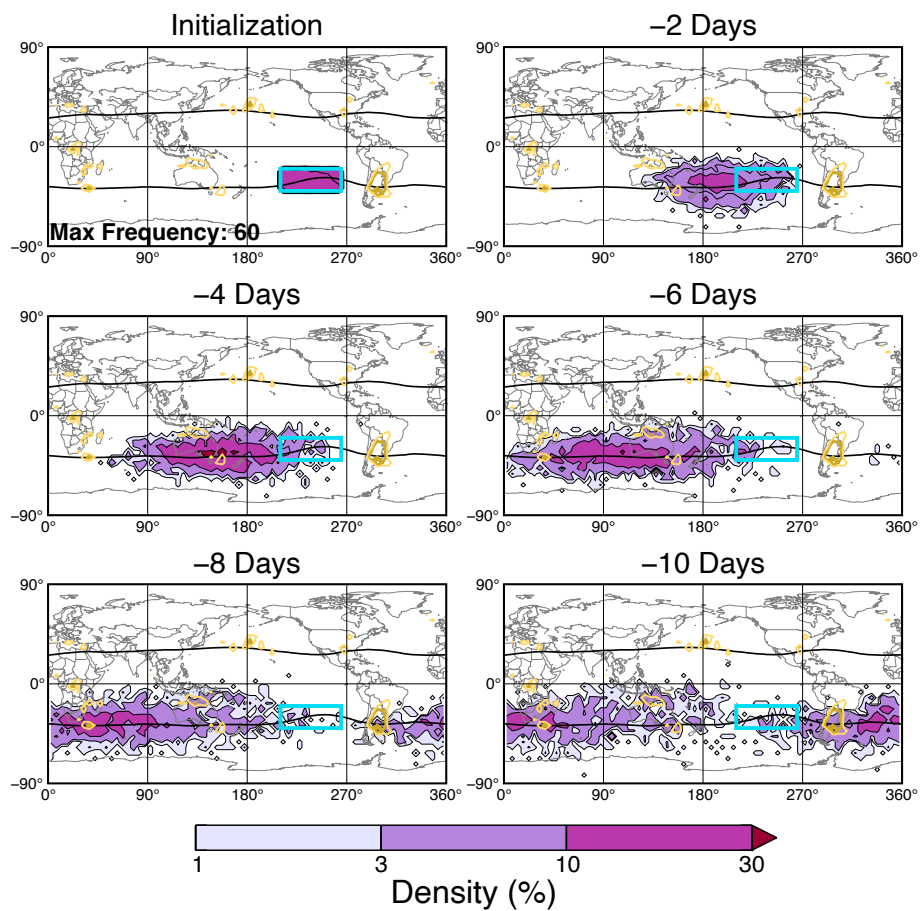

**Figure A4.** As in Fig. 3, but for the SP region in DJF.

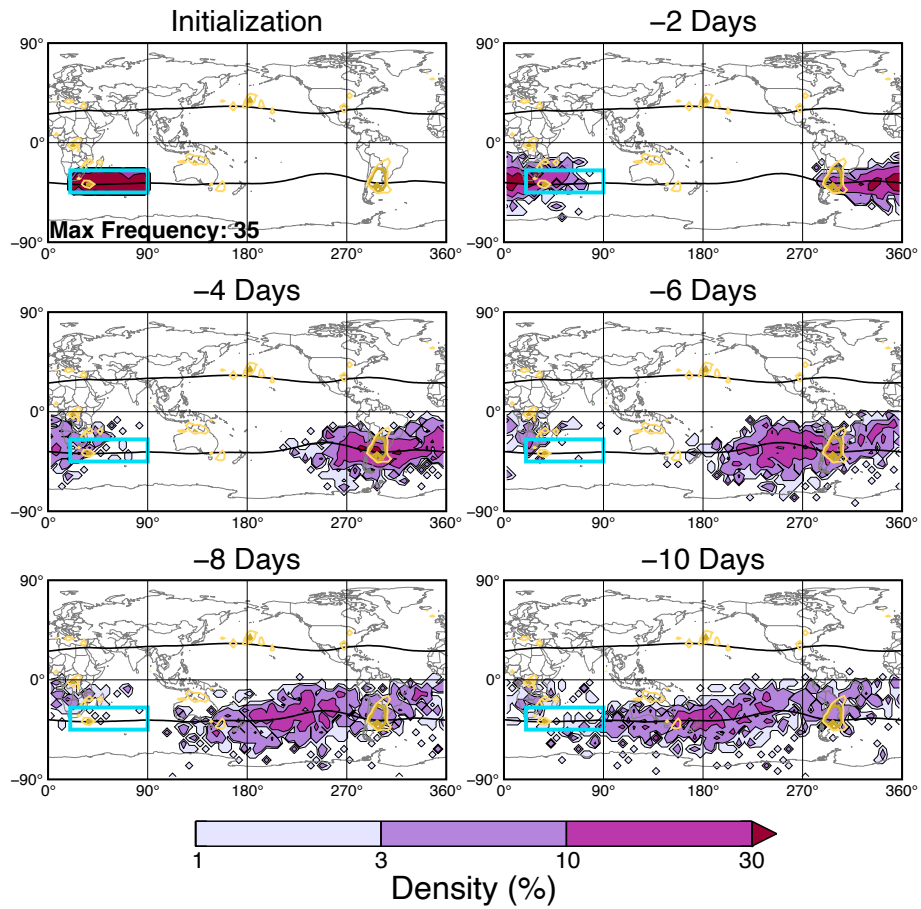

**Figure A5.** As in Fig. 3, but for the SI region in DJF.

*Author contributions.* ET and CH designed the study and ET carried it out. ET wrote the original draft of the manuscript, with review and editing by CH. **ET led the revision and author comments during public discussion, with review and editing by CH.**

*Competing interests.* The authors declare that they have no conflict of interest.

405 *Acknowledgements.* We thank Nana Liu and Chuntao Liu for providing the processed GPM data used for context in this manuscript. **We also thank two anonymous reviewers for their helpful feedback on the paper.** This work was supported by the National Aeronautics and Space Administration (NASA) under Awards 80NSSC18K0746 and 80NSSC19K0347.



## References

- Banerjee, A., Chiodo, G., Previdi, M., Ponater, M., Conley, A. J., and Polvani, L. M.: Stratospheric water vapor: an important climate  
410 feedback, *Climate Dynamics*, 53, 1697–1710, <https://doi.org/10.1007/s00382-019-04721-4>, 2019.
- Bergman, J. W., Fierli, F., Jensen, E. J., Homomichl, S., and Pan, L. L.: Boundary layer sources for the Asian anticyclone: Regional contributions to a vertical conduit, *Journal of Geophysical Research: Atmospheres*, 118, 2560–2575, <https://doi.org/https://doi.org/10.1002/jgrd.50142>, 2013.
- Bowman, K. P.: Large-scale isentropic mixing properties of the Antarctic polar vortex from analyzed winds, *Journal of Geophysical Research: Atmospheres*, 98, 23 013–23 027, <https://doi.org/10.1029/93JD02599>, 1993.  
415
- Bowman, K. P. and Carrie, G. D.: The Mean-Meridional Transport Circulation of the Troposphere in an Idealized GCM, *Journal of the Atmospheric Sciences*, 59, 1502–1514, [https://doi.org/10.1175/1520-0469\(2002\)059<1502:TMMTCO>2.0.CO;2](https://doi.org/10.1175/1520-0469(2002)059<1502:TMMTCO>2.0.CO;2), 2002.
- Bowman, K. P., Lin, J., Stohl, A., Draxler, R., Konopka, P., Andrews, A., and Brunner, D.: Input Data Requirements Lagrangian Trajectory Models, *Bulletin of the American Meteorological Society*, 94, 1051–1058, <https://doi.org/10.1175/BAMS-D-12-00076.1>, 2013.
- 420 Clapp, C., Smith, J., Bedka, K., and Anderson, J.: Identifying Source Regions and the Distribution of Cross-Tropopause Convective Outflow Over North America During the Warm Season, *Journal of Geophysical Research: Atmospheres*, 124, 13 750–13 762, <https://doi.org/https://doi.org/10.1029/2019JD031382>, 2019.
- Clapp, C. E., Smith, J. B., Bedka, K. M., and Anderson, J. G.: Identifying Outflow Regions of North American Monsoon Anticyclone-Mediated Meridional Transport of Convectively Influenced Air Masses in the Lower Stratosphere, *Journal of Geophysical Research: Atmospheres*, 126, e2021JD034 644, <https://doi.org/https://doi.org/10.1029/2021JD034644>, e2021JD034644 2021JD034644, 2021.  
425
- Cooney, J. W., Bowman, K. P., Homeyer, C. R., and Fenske, T. M.: Ten Year Analysis of Tropopause-Overshooting Convection Using GridRad Data, *Journal of Geophysical Research: Atmospheres*, 123, 329–343, <https://doi.org/10.1002/2017JD027718>, 2018.
- Dauhut, T. and Hohenegger, C.: The Contribution of Convection to the Stratospheric Water Vapor: The First Budget Using a Global Storm-Resolving Model, *Journal of Geophysical Research: Atmospheres*, 127, e2021JD036 295, <https://doi.org/https://doi.org/10.1029/2021JD036295>, e2021JD036295 2021JD036295, 2022.  
430
- Dessler, A. E. and Sherwood, S. C.: Effect of convection on the summertime extratropical lower stratosphere, *Journal of Geophysical Research: Atmospheres*, 109, <https://doi.org/10.1029/2004JD005209>, 2004.
- Dessler, A. E., Schoeberl, M. R., Wang, T., Davis, S. M., and Rosenlof, K. H.: Stratospheric water vapor feedback, *Proceedings of the National Academy of Sciences*, 110, 18 087–18 091, <https://doi.org/10.1073/pnas.1310344110>, 2013.
- 435 Gelaro, R., McCarty, W., Suárez, M. J., Todling, R., Molod, A., Molod, A., Takacs, L., Randles, C. A., Darmenov, A., Bosilovich, M. G., Reichle, R., Wargan, K., Coy, L., Cullather, R., Draper, C., Akella, S., Buchard, V., Conaty, A., Da Silva, A. M., Gu, W., Kim, G.-K., Koster, R., Lucchesi, R., Merkova, D., Nielsen, J. E., Partyka, G., Pawson, S., Putnam, W., Rienecker, M., Schubert, S. D., Sienkiewicz, M., and Zhao, B.: The Modern-Era Retrospective Analysis for Research and Applications, Version 2 (MERRA-2), *J. Clim.*, 30, 5419–5454, <https://doi.org/10.1175/JCLI-D-16-0758.1>, 2017.
- 440 Global Modeling and Assimilation Office (GMAO): MERRA-2 inst3\_3d\_asm\_Nv: 3d, 3-Hourly, Instantaneous, Model-Level, Assimilation, Assimilated Meteorological Fields V5.12.4, <https://doi.org/10.5067/WWQSQX8IVFW8>, 2015.
- Gordon, A. E. and Homeyer, C. R.: Sensitivities of Cross-Tropopause Transport in Midlatitude Overshooting Convection to the Lower Stratosphere Environment, *Journal of Geophysical Research: Atmospheres*, 127, e2022JD036 713, <https://doi.org/https://doi.org/10.1029/2022JD036713>, e2022JD036713 2022JD036713, 2022.

- 445 Hanisco, T. F., Moyer, E. J., Weinstock, E. M., St. Clair, J. M., Sayres, D. S., Smith, J. B., Lockwood, R., Anderson, J. G., Dessler, A. E., Keutsch, F. N., Spackman, J. R., Read, W. G., and Bui, T. P.: Observations of deep convective influence on stratospheric water vapor and its isotopic composition, *Geophysical Research Letters*, 34, <https://doi.org/10.1029/2006GL027899>, 2007.
- Hegglin, M. I., Brunner, D., Wernli, H., Schwierz, C., Martius, O., Hoor, P., Fischer, H., Parchatka, U., Spelten, N., Schiller, C., Krebsbach, M., Weers, U., Staehelin, J., and Peter, T.: Tracing troposphere-to-stratosphere transport above a mid-latitude deep convective system, *Atmospheric Chemistry and Physics*, 4, 741–756, <https://doi.org/10.5194/acp-4-741-2004>, 2004.
- 450 Hersbach, H., Bell, B., Berrisford, P., Hirahara, S., Horányi, A., Muñoz-Sabater, J., Nicolas, J., Peubey, C., Radu, R., Schepers, D., Simmons, A., Soci, C., Abdalla, S., Abellan, X., Balsamo, G., Bechtold, P., Biavati, G., Bidlot, J., Bonavita, M., De Chiara, G., Dahlgren, P., Dee, D., Diamantakis, M., Dragani, R., Flemming, J., Forbes, R., Fuentes, M., Geer, A., Haimberger, L., Healy, S., Hogan, R. J., Hólm, E., Janisková, M., Keeley, S., Laloyaux, P., Lopez, P., Lupu, C., Radnoti, G., de Rosnay, P., Rozum, I., Vamborg, F., Villaume, S., and Thépaut, J.-N.: The ERA5 global reanalysis, *Quarterly Journal of the Royal Meteorological Society*, 146, 1999–2049, <https://doi.org/https://doi.org/10.1002/qj.3803>, 2020.
- 455 Holton, J. R., Haynes, P. H., McIntyre, M. E., Douglass, A. R., Rood, R. B., and Pfister, L.: Stratosphere-troposphere exchange, *Reviews of Geophysics*, 33, 403–439, <https://doi.org/10.1029/95RG02097>, 1995.
- Homeyer, C. R. and Bowman, K. P.: Rossby Wave Breaking and Transport between the Tropics and Extratropics above the Subtropical Jet, *Journal of the Atmospheric Sciences*, 70, 607–626, <https://doi.org/10.1175/JAS-D-12-0198.1>, 2013.
- 460 Homeyer, C. R. and Bowman, K. P.: A 22-Year Evaluation of Convection Reaching the Stratosphere Over the United States, *Journal of Geophysical Research: Atmospheres*, 126, e2021JD034808, <https://doi.org/https://doi.org/10.1029/2021JD034808>, e2021JD034808 2021JD034808, 2021.
- Homeyer, C. R., Bowman, K. P., Pan, L. L., Atlas, E. L., Gao, R.-S., and Campos, T. L.: Dynamical and chemical characteristics of tropospheric intrusions observed during START08, *Journal of Geophysical Research: Atmospheres*, 116, <https://doi.org/https://doi.org/10.1029/2010JD015098>, 2011.
- 465 Homeyer, C. R., Pan, L. L., Dorsi, S. W., Avallone, L. M., Weinheimer, A. J., O'Brien, A. S., DiGangi, J. P., Zondlo, M. A., Ryerson, T. B., Diskin, G. S., and Campos, T. L.: Convective transport of water vapor into the lower stratosphere observed during double-tropopause events, *Journal of Geophysical Research: Atmospheres*, 119, 10,941–10,958, <https://doi.org/10.1002/2014JD021485>, 2014.
- 470 Honomichl, S. B. and Pan, L. L.: Transport From the Asian Summer Monsoon Anticyclone Over the Western Pacific, *Journal of Geophysical Research: Atmospheres*, 125, e2019JD032094, <https://doi.org/https://doi.org/10.1029/2019JD032094>, e2019JD032094 2019JD032094, 2020.
- Hoskins, B. J.: Towards a PV- view of the general circulation, *Tellus B*, 43, 27–35, <https://doi.org/https://doi.org/10.1034/j.1600-0889.1991.t01-3-00005.x>, 1991.
- 475 Hou, A. Y., Kakar, R. K., Neeck, S., Azarbarzin, A. A., Kummerow, C. D., Kojima, M., Oki, R., Nakamura, K., and Iguchi, T.: The Global Precipitation Measurement Mission, *Bulletin of the American Meteorological Society*, 95, 701 – 722, <https://doi.org/https://doi.org/10.1175/BAMS-D-13-00164.1>, 2014.
- Jensen, E. J., Pan, L. L., Honomichl, S., Diskin, G. S., Krämer, M., Spelten, N., Günther, G., Hurst, D. F., Fujiwara, M., Vömel, H., Selkirk, H. B., Suzuki, J., Schwartz, M. J., and Smith, J. B.: Assessment of Observational Evidence for Direct Convective Hydration of the Lower Stratosphere, *Journal of Geophysical Research: Atmospheres*, 125, e2020JD032793, <https://doi.org/10.1029/2020JD032793>, 2020.
- 480 Khaykin, S. M., Moyer, E., Krämer, M., Clouser, B., Bucci, S., Legras, B., Lykov, A., Afchine, A., Cairo, F., Formanyuk, I., Mitev, V., Matthey, R., Rolf, C., Singer, C. E., Spelten, N., Volkov, V., Yushkov, V., and Stroth, F.: Persistence of moist plumes from overshooting

- convection in the Asian monsoon anticyclone, *Atmospheric Chemistry and Physics*, 22, 3169–3189, <https://doi.org/10.5194/acp-22-3169-2022>, 2022.
- 485 Konopka, P., Groöf, J.-U., Günther, G., Ploeger, F., Pommrich, R., Müller, R., and Livesey, N.: Annual cycle of ozone at and above the tropical tropopause: observations versus simulations with the Chemical Lagrangian Model of the Stratosphere (CLaMS), *Atmospheric Chemistry and Physics*, 10, 121–132, <https://doi.org/10.5194/acp-10-121-2010>, 2010.
- Konopka, P., Tao, M., Ploeger, F., Hurst, D. F., Santee, M. L., Wright, J. S., and Riese, M.: Stratospheric Moistening After 2000, *Geophysical Research Letters*, 49, e2021GL097609, <https://doi.org/https://doi.org/10.1029/2021GL097609>, e2021GL097609 2021GL097609, 2022.
- 490 Lambert, A., Read, W., and Livesey, N.: MLS/Aura Level 2 Water Vapor (H<sub>2</sub>O) Mixing Ratio V005, <https://doi.org/10.5067/Aura/MLS/DATA2508>, 2020.
- Langille, J., Bourassa, A., Pan, L. L., Letros, D., Solheim, B., Zawada, D., and Degenstein, D.: Observational evidence of moistening the lowermost stratosphere via isentropic mixing across the subtropical jet, *Atmospheric Chemistry and Physics*, 20, 5477–5486, <https://doi.org/10.5194/acp-20-5477-2020>, 2020.
- 495 Liu, C., Zipser, E. J., Cecil, D. J., Nesbitt, S. W., and Sherwood, S.: A Cloud and Precipitation Feature Database from Nine Years of TRMM Observations, *Journal of Applied Meteorology and Climatology*, 47, 2712 – 2728, <https://doi.org/https://doi.org/10.1175/2008JAMC1890.1>, 2008.
- Liu, N. and Liu, C.: Global distribution of deep convection reaching tropopause in 1 year GPM observations, *Journal of Geophysical Research: Atmospheres*, 121, 3824–3842, <https://doi.org/10.1002/2015JD024430>, 2016.
- 500 Liu, N., Liu, C., and Hayden, L.: Climatology and Detection of Overshooting Convection From 4 Years of GPM Precipitation Radar and Passive Microwave Observations, *J. Geophys. Res. Atmos.*, 125, e2019JD032003, <https://doi.org/10.1029/2019JD032003>, 2020.
- Livesey, N. J., Read, W. G., Wagner, P. A., Froidevaux, L., Lambert, A., Manney, G. L., Valle, L. F. M., Pumphrey, H. C., Santee, M. L., Schwartz, M. J., Wang, S., Fuller, R. A., Jarnot, R. F., Knosp, B. W., Martinez, E., and Lay, R. R.: Earth Observing System (EOS) Aura Microwave Limb Sounder (MLS): Version 4.2x Level 2 data quality and description document, available online at: [https://mls.jpl.nasa.gov/data/v4-2\\_data\\_quality\\_document.pdf](https://mls.jpl.nasa.gov/data/v4-2_data_quality_document.pdf), 2020.
- 505 Mote, P. W., Rosenlof, K. H., McIntyre, M. E., Carr, E. S., Gille, J. C., Holton, J. R., Kinnery, J. S., Pumphrey, H. C., Russell III, J. M., and Waters, J. W.: An atmospheric tape recorder: The imprint of tropical tropopause temperatures on stratospheric water vapor, *Journal of Geophysical Research: Atmospheres*, 101, 3989–4006, <https://doi.org/https://doi.org/10.1029/95JD03422>, 1996.
- Mullendore, G. L., Durran, D. R., and Holton, J. R.: Cross-tropopause tracer transport in midlatitude convection, *Journal of Geophysical Research: Atmospheres*, 110, <https://doi.org/https://doi.org/10.1029/2004JD005059>, 2005.
- 510 Munchak, L. A. and Pan, L. L.: Separation of the lapse rate and the cold point tropopauses in the tropics and the resulting impact on cloud top-tropopause relationships, *Journal of Geophysical Research: Atmospheres*, 119, 7963–7978, <https://doi.org/https://doi.org/10.1002/2013JD021189>, 2014.
- Nesbitt, S. W., Zipser, E. J., and Cecil, D. J.: A Census of Precipitation Features in the Tropics Using TRMM: Radar, Ice Scattering, and Lightning Observations, *Journal of Climate*, 13, 4087 – 4106, [https://doi.org/https://doi.org/10.1175/1520-0442\(2000\)013<4087:ACOPFI>2.0.CO;2](https://doi.org/https://doi.org/10.1175/1520-0442(2000)013<4087:ACOPFI>2.0.CO;2), 2000.
- 515 Nowack, P., Ceppi, P., Davis, S. M., Chiodo, G., Ball, W., Diallo, M. A., Hassler, B., Jia, Y., Keeble, J., and Joshi, M.: Response of stratospheric water vapour to warming constrained by satellite observations, *Nature Geoscience*, 16, 577–583, <https://doi.org/10.1038/s41561-023-01183-6>, 2023.

- 520 O'Neill, M. E., Orf, L., Heymsfield, G. M., and Halbert, K.: Hydraulic jump dynamics above supercell thunderstorms, *Science*, 373, 1248–1251, <https://doi.org/10.1126/science.abh3857>, 2021.
- Pan, L. L., Randel, W. J., Gille, J. C., Hall, W. D., Nardi, B., Massie, S., Yudin, V., Khosravi, R., Konopka, P., and Tarasick, D.: Tropospheric intrusions associated with the secondary tropopause, *Journal of Geophysical Research: Atmospheres*, 114, <https://doi.org/10.1029/2008JD011374>, 2009.
- 525 Pan, L. L., Honomichl, S. B., Kinnison, D. E., Abalos, M., Randel, W. J., Bergman, J. W., and Bian, J.: Transport of chemical tracers from the boundary layer to stratosphere associated with the dynamics of the Asian summer monsoon, *Journal of Geophysical Research: Atmospheres*, 121, 14,159–14,174, <https://doi.org/https://doi.org/10.1002/2016JD025616>, 2016.
- Pan, L. L., Kinnison, D., Liang, Q., Chin, M., Santee, M. L., Flemming, J., Smith, W. P., Honomichl, S. B., Bresch, J. F., Lait, L. R., Zhu, Y., Tilmes, S., Colarco, P. R., Warner, J., Vuvan, A., Clerbaux, C., Atlas, E. L., Newman, P. A., Thornberry, T., Randel, W. J., and Toon, O. B.:  
530 A Multimodel Investigation of Asian Summer Monsoon UTLS Transport Over the Western Pacific, *Journal of Geophysical Research: Atmospheres*, 127, e2022JD037511, <https://doi.org/https://doi.org/10.1029/2022JD037511>, e2022JD037511 2022JD037511, 2022.
- Phoenix, D. B. and Homeyer, C. R.: Simulated Impacts of Tropopause-Overshooting Convection on the Chemical Composition of the Upper Troposphere and Lower Stratosphere, *Journal of Geophysical Research: Atmospheres*, 126, e2021JD034568, <https://doi.org/https://doi.org/10.1029/2021JD034568>, e2021JD034568 2021JD034568, 2021.
- 535 Ploeger, F., Günther, G., Konopka, P., Fueglistaler, S., Müller, R., Hoppe, C., Kunz, A., Spang, R., Groß, J.-U., and Riese, M.: Horizontal water vapor transport in the lower stratosphere from subtropics to high latitudes during boreal summer, *Journal of Geophysical Research: Atmospheres*, 118, 8111–8127, <https://doi.org/https://doi.org/10.1002/jgrd.50636>, 2013.
- Randel, W. and Park, M.: Diagnosing Observed Stratospheric Water Vapor Relationships to the Cold Point Tropical Tropopause, *Journal of Geophysical Research: Atmospheres*, 124, 7018–7033, <https://doi.org/https://doi.org/10.1029/2019JD030648>, 2019.
- 540 Randel, W. J., Park, M., Emmons, L., Kinnison, D., Bernath, P., Walker, K. A., Boone, C., and Pumphrey, H.: Asian Monsoon Transport of Pollution to the Stratosphere, *Science*, 328, 611–613, <https://doi.org/10.1126/science.1182274>, 2010.
- Randel, W. J., Moyer, E., Park, M., Jensen, E., Bernath, P., Walker, K., and Boone, C.: Global variations of HDO and HDO/H<sub>2</sub>O ratios in the upper troposphere and lower stratosphere derived from ACE-FTS satellite measurements, *Journal of Geophysical Research: Atmospheres*, 117, <https://doi.org/10.1029/2011JD016632>, 2012.
- 545 Roiger, A., Schlager, H., Schäfler, A., Huntrieser, H., Scheibe, M., Aufmhoff, H., Cooper, O. R., Sodemann, H., Stohl, A., Burkhart, J., Lazarra, M., Schiller, C., Law, K. S., and Arnold, F.: In-situ observation of Asian pollution transported into the Arctic lowermost stratosphere, *Atmospheric Chemistry and Physics*, 11, 10975–10994, <https://doi.org/10.5194/acp-11-10975-2011>, 2011.
- Schwartz, M. J., Read, W. G., Santee, M. L., Livesey, N. J., Froidevaux, L., Lambert, A., and Manney, G. L.: Convectively injected water vapor in the North American summer lowermost stratosphere, *Geophysical Research Letters*, 40, 2316–2321, <https://doi.org/10.1002/grl.50421>,  
550 2013.
- Schwartz, M. J., Manney, G. L., Hegglin, M. I., Livesey, N. J., Santee, M. L., and Daffer, W. H.: Climatology and variability of trace gases in extratropical double-tropopause regions from MLS, HIRDLS, and ACE-FTS measurements, *J. Geophys. Res. Atmos.*, 120, 843–867, <https://doi.org/10.1002/2014JD021964>, 2015.
- Skofronick-Jackson, G., Petersen, W. A., Berg, W., Kidd, C., Stocker, E. F., Kirschbaum, D. B., Kakar, R., Braun, S. A., Huffman, G. J.,  
555 Iguchi, T., Kirstetter, P. E., Kummerow, C., Meneghini, R., Oki, R., Olson, W. S., Takayabu, Y. N., Furukawa, K., and Wilhelm, T.: The Global Precipitation Measurement (GPM) Mission for Science and Society, *Bulletin of the American Meteorological Society*, 98, 1679 – 1695, <https://doi.org/https://doi.org/10.1175/BAMS-D-15-00306.1>, 2017.

- Smith, J. B., Wilmoth, D. M., Bedka, K. M., Bowman, K. P., Homeyer, C. R., Dykema, J. A., Sargent, M. R., Clapp, C. E., Leroy, S. S., Sayres, D. S., Dean-Day, J. M., Paul Bui, T., and Anderson, J. G.: A case study of convectively sourced water vapor observed in the overworld stratosphere over the United States, *Journal of Geophysical Research: Atmospheres*, 122, 9529–9554, <https://doi.org/10.1002/2017JD026831>, 2017.
- 560 Solomon, D. L., Bowman, K. P., and Homeyer, C. R.: Tropopause-Penetrating Convection from Three-Dimensional Gridded NEXRAD Data, *Journal of Applied Meteorology and Climatology*, 55, 465–478, <https://doi.org/10.1175/JAMC-D-15-0190.1>, 2016.
- Solomon, S., Rosenlof, K. H., Portmann, R. W., Daniell, J. S., Davis, S. M., Sanford, T. J., and Plattner, G.-K.: Contributions of Stratospheric Water Vapor to Decadal Changes in the Rate of Global Warming, *Science*, 327, 1219–1223, <https://doi.org/10.1126/science.1182488>, 2010.
- 565 Stohl, A.: A 1-year Lagrangian “climatology” of airstreams in the northern hemisphere troposphere and lowermost stratosphere, *Journal of Geophysical Research: Atmospheres*, 106, 7263–7279, <https://doi.org/https://doi.org/10.1029/2000JD900570>, 2001.
- Stohl, A., Wotawa, G., Seibert, P., and Kromp-Kolb, H.: Interpolation Errors in Wind Fields as a Function of Spatial and Temporal Resolution and Their Impact on Different Types of Kinematic Trajectories, *Journal of Applied Meteorology (1988-2005)*, 34, 2149–2165, [https://doi.org/10.1175/1520-0450\(1995\)034<2149:IEIWFA>2.0.CO;2](https://doi.org/10.1175/1520-0450(1995)034<2149:IEIWFA>2.0.CO;2), 1995.
- 570 Stohl, A., Wernli, H., James, P., Bourqui, M., Forster, C., Liniger, M. A., Seibert, P., and Sprenger, M.: A new perspective of stratosphere-troposphere exchange, *Bull. Amer. Meteorol. Soc.*, 84, 1565–1573, 2003.
- Tinney, E. N. and Homeyer, C. R.: A 13-year Trajectory-Based Analysis of Convection-Driven Changes in Upper Troposphere Lower Stratosphere Composition Over the United States, *Journal of Geophysical Research: Atmospheres*, 126, e2020JD033657, <https://doi.org/https://doi.org/10.1029/2020JD033657>, 2021.
- 575 Ueyama, R., Schoeberl, M., Jensen, E., Pfister, L., Park, M., and Ryoo, J.-M.: Convective Impact on the Global Lower Stratospheric Water Vapor Budget, *Journal of Geophysical Research: Atmospheres*, 128, e2022JD037135, <https://doi.org/https://doi.org/10.1029/2022JD037135>, e2022JD037135 2022JD037135, 2023.
- 580 Vincent, D. G.: The South Pacific Convergence Zone (SPCZ): A Review, *Monthly Weather Review*, 122, 1949 – 1970, [https://doi.org/https://doi.org/10.1175/1520-0493\(1994\)122<1949:TSPCZA>2.0.CO;2](https://doi.org/https://doi.org/10.1175/1520-0493(1994)122<1949:TSPCZA>2.0.CO;2), 1994.
- Wang, Y., Su, H., Jiang, J. H., Livesey, N. J., Santee, M. L., Froidevaux, L., Read, W. G., and Anderson, J.: The linkage between stratospheric water vapor and surface temperature in an observation-constrained coupled general circulation model, *Climate Dynamics*, 48, 2671–2683, <https://doi.org/10.1007/s00382-016-3231-3>, 2017.
- 585 Werner, F., Schwartz, M. J., Livesey, N. J., Read, W. G., and Santee, M. L.: Extreme Outliers in Lower Stratospheric Water Vapor Over North America Observed by MLS: Relation to Overshooting Convection Diagnosed From Colocated Aqua-MODIS Data, *Geophysical Research Letters*, 47, e2020GL090131, <https://doi.org/https://doi.org/10.1029/2020GL090131>, e2020GL090131 10.1029/2020GL090131, 2020.
- Wernli, H. and Bourqui, M.: A Lagrangian “1-year climatology” of (deep) cross-tropopause exchange in the extratropical Northern Hemisphere, *Journal of Geophysical Research: Atmospheres*, 107, ACL 13–1–ACL 13–16, <https://doi.org/https://doi.org/10.1029/2001JD000812>, 2002.
- 590 World Meteorological Organization: A three-dimensional science: Second session of the commission for aerology, 1957.
